# Supplementary material for: Biological Response of Planktic Foraminifera to Decline in Seawater pH
Source: MDPI journal article supplement (doi:10.3390/biology11010098), 2022-01-09
Supplement: s1 [file s1]

## Supporting information

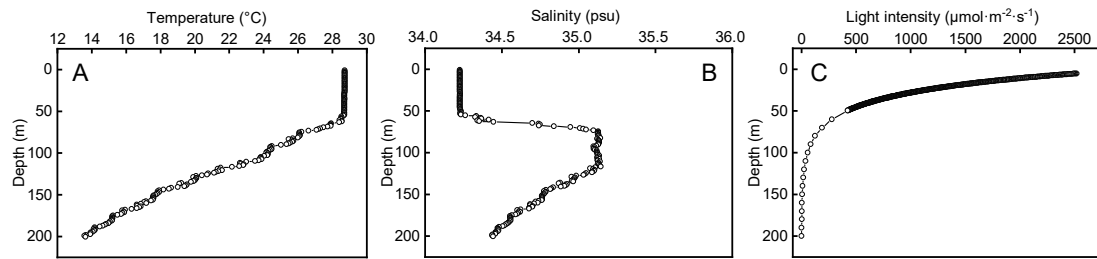

**Figure S1.** The in situ temperature (A), salinity (B), and light intensity (C) data under different depths.

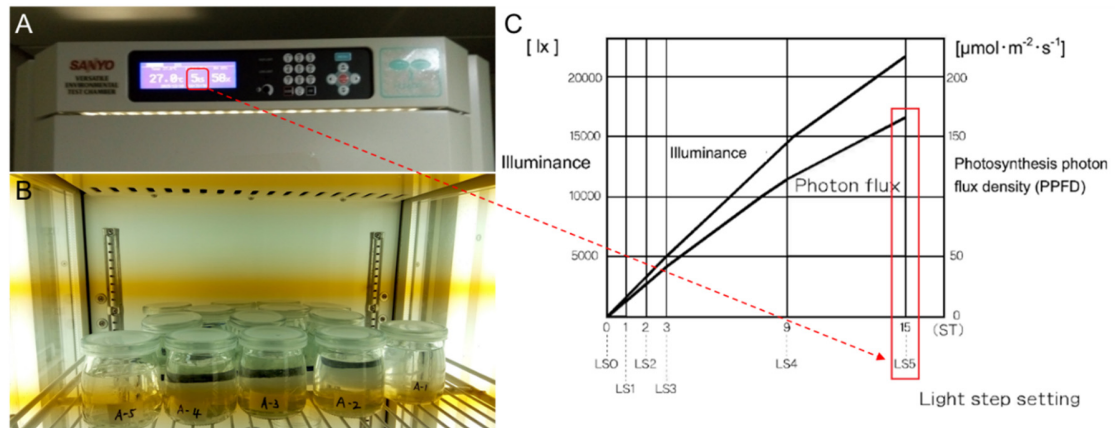

**Figure S2.** The setup of the incubator culture program (A), view of the situation inside the incubator (B), and the light intensity instruction of the incubators (C). Note: There were six levels of light intensity (LS0–LS5) for the incubator. In present study, we set the maximum level of light intensity (LS5,  $\sim 170 \mu\text{mol}\cdot\text{m}^{-2}\cdot\text{s}^{-1}/20000 \text{ Lux}$ ) and a 12h: 12h light: dark cycle at 27°C. The red boxes showed the light set in our experiment and the light intensity was about  $170 \mu\text{mol}\cdot\text{m}^{-2}\cdot\text{s}^{-1}$ . Picture C was modified from the instruction manual for SANYO MLR-351H.

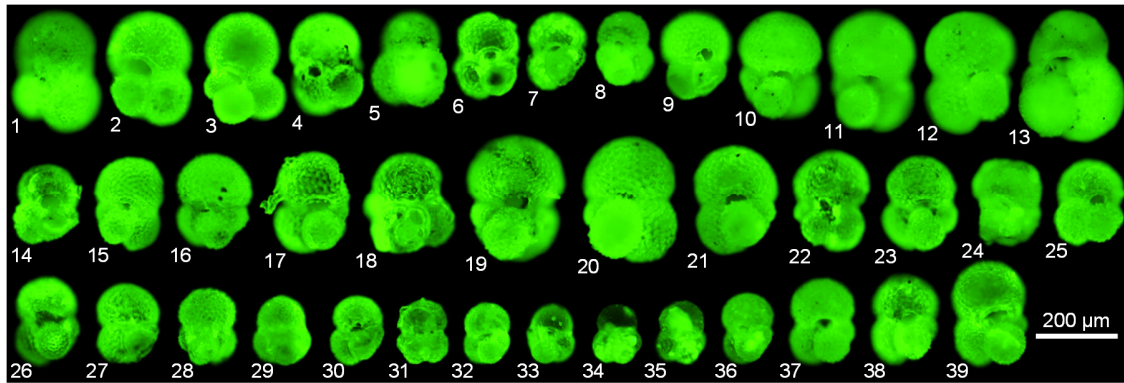

**Figure S3.** Representative fluorescent-labeled specimens from the community experiment. Note: pH 8.65: 1–6; pH 8.40: 7–13; pH 8.15: 14–25; pH 7.90: 26–33; pH 7.65: 34–39. Scale bar = 200  $\mu\text{m}$ .

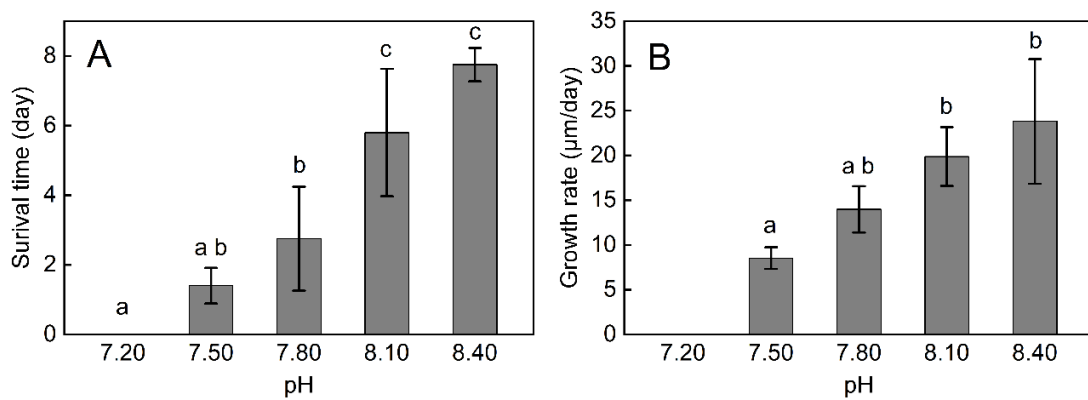

**Figure S4.** Survival time (**A**) and growth rate (**B**) of *Trilobatus sacculifer* under different pH treatments. Different letters on the top of histogram bars indicate significant differences ( $p < 0.05$ ) from the analysis of ANOVA. Error bar = SE. Note: All individuals of *T. sacculifer* cultured at pH = 7.20 died within the first day, the mean survival time was zero and analyzed in the ANOVA. However, the growth rate couldn't be calculated and not analyzed in the ANOVA.

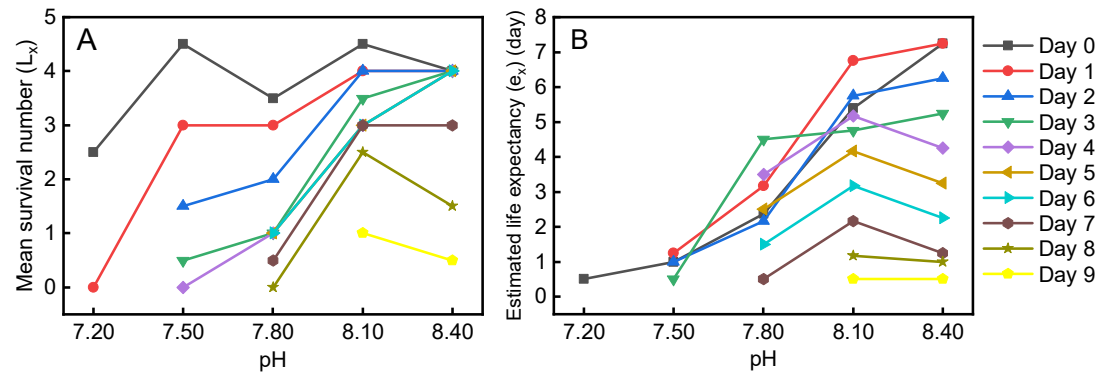

**Figure S5.** Mean survival number ( $L_x$ ) (A) and estimated life expectancy ( $e_x$ ) (B) of *T. sacculifer* under different pH treatments and culture times.

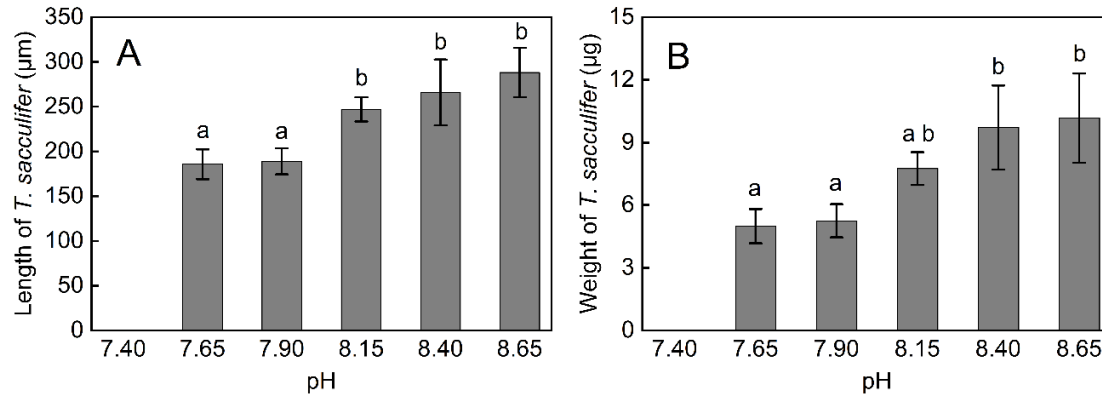

**Figure S6.** Length (A) and weight (B) of *T. sacculifer* cultured for 12 days at 6 different pH levels. Different letters on the top of histogram bars indicate significant differences ( $p < 0.05$ ) from the analysis of ANOVA. Error bar = SE. Note: There was no living *T. sacculifer* under the pH 7.40 treatment and no data from this treatment was analyzed in the ANOVA.

**Table S1.** The original data-set of *in situ* temperature, salinity, and light intensity under different depths. It is a data set and uploaded separately in an excel file named as “Supporting Table S1”.

**Table S2.** Detailed description of the individual experiments.

| Experimental<br>set up | pH   | Number of<br>replicates<br>(individuals) |
|------------------------|------|------------------------------------------|
| Low pH                 | 7.20 | 5                                        |
| Low pH                 | 7.50 | 5                                        |
| Low pH                 | 7.80 | 4                                        |
| Reference              | 8.10 | 5                                        |
| High pH                | 8.40 | 4                                        |

**Table S3.** Life table of *T. sacculifer* cultured at 6 different pH levels. Note: The first column ( $x$ ) shows the age and the second column ( $N_x$ ) is the number of living *T. sacculifer* at the beginning of each age stage. The third column ( $l_x$ ) is the proportion of surviving comparing the initial number at each age stage. The forth column ( $d_x$ ) is the number of dying individual at each age stage. The fifth column ( $q_x$ ) was the ratio of the individual dying at each age stage. The sixth and seventh columns are two parameters and calculated as  $L_x = (l_x + l_{x+1})/2$ ,  $T_x = L_x + L_{x+1} + \dots + L_{x+n}$ . The eighth column ( $e_x$ ) is the life expectancy and calculated as  $e_x = T_x/N_x$ .

| Treatments | Age ( $x$ ) | $N_x$ | $l_x$ | $d_x$ | $q_x$ | $L_x$ | $T_x$ | $e_x$ |
|------------|-------------|-------|-------|-------|-------|-------|-------|-------|
|            | 0           | 5     | 1     | 5     | 1     | 2.5   | 2.5   | 0.5   |

|         |    |   |      |   |      |     |      |      |
|---------|----|---|------|---|------|-----|------|------|
| pH 7.20 | 1  | 0 | 0    | – | –    | 0   | 0    | –    |
|         | 0  | 5 | 1    | 1 | 0.2  | 4.5 | 5    | 1    |
| pH 7.50 | 1  | 4 | 0.8  | 2 | 0.5  | 3   | 5    | 1.25 |
|         | 2  | 2 | 0.4  | 1 | 0.5  | 1.5 | 2    | 1    |
|         | 3  | 1 | 0.2  | 1 | 1    | 0.5 | 0.5  | 0.5  |
|         | 4  | 0 | 0    | – | –    | 0   | 0    | –    |
|         | 0  | 4 | 1    | 1 | 0.25 | 3.5 | 9.5  | 2.38 |
| pH 7.80 | 1  | 3 | 0.75 | 0 | 0    | 3   | 9.5  | 3.17 |
|         | 2  | 3 | 0.75 | 2 | 0.66 | 2   | 6.5  | 2.17 |
|         | 3  | 1 | 0.25 | 0 | 0    | 1   | 4.5  | 4.5  |
|         | 4  | 1 | 0.25 | 0 | 0    | 1   | 3.5  | 3.5  |
|         | 5  | 1 | 0.25 | 0 | 0    | 1   | 2.5  | 2.5  |
|         | 6  | 1 | 0.25 | 0 | 0    | 1   | 1.5  | 1.5  |
|         | 7  | 1 | 0.25 | 1 | 1    | 0.5 | 0.5  | 0.5  |
|         | 8  | 0 | 0    | – | –    | 0   | 0    | –    |
|         | 0  | 5 | 1    | 1 | 0.2  | 4.5 | 27   | 5.4  |
| pH 8.10 | 1  | 4 | 0.8  | 0 | 0    | 4   | 27   | 6.75 |
|         | 2  | 4 | 0.8  | 0 | 0    | 4   | 23   | 5.75 |
|         | 3  | 4 | 0.8  | 1 | 0.25 | 3.5 | 19   | 4.75 |
|         | 4  | 3 | 0.6  | 0 | 0    | 3   | 15.5 | 5.17 |
|         | 5  | 3 | 0.6  | 0 | 0    | 3   | 12.5 | 4.17 |
|         | 6  | 3 | 0.6  | 0 | 0    | 3   | 9.5  | 3.17 |
|         | 7  | 3 | 0.6  | 0 | 0    | 3   | 6.5  | 2.17 |
|         | 8  | 3 | 0.6  | 1 | 0.33 | 2.5 | 3.5  | 1.17 |
|         | 9  | 2 | 0.4  | 2 | 1    | 1   | 1    | 0.5  |
|         | 10 | 0 | 0    | – | –    | 0   | 16   | –    |
| pH 8.40 | 0  | 4 | 1    | 0 | 0    | 4   | 29   | 7.25 |
|         | 1  | 4 | 1    | 0 | 0    | 4   | 29   | 7.25 |
|         | 2  | 4 | 1    | 0 | 0    | 4   | 25   | 6.25 |
|         | 3  | 4 | 1    | 0 | 0    | 4   | 21   | 5.25 |
|         | 4  | 4 | 1    | 0 | 0    | 4   | 17   | 4.25 |
|         | 5  | 4 | 1    | 0 | 0    | 4   | 13   | 3.25 |
|         | 6  | 4 | 1    | 0 | 0    | 4   | 9    | 2.25 |
|         | 7  | 4 | 1    | 2 | 0.5  | 3   | 5    | 1.25 |
|         | 8  | 2 | 0.5  | 1 | 0.5  | 1.5 | 2    | 1    |
|         | 9  | 1 | 0.25 | 1 | 1    | 0.5 | 0.5  | 0.5  |
|         | 10 | 0 | 0    | – | –    | 0   | 0    | –    |

**Table S4.** Parameters of length measured from *T. sacculifer* cultured at 6 different pH levels.

| pH                       | 7.40 (N=0) | 7.65 (N=6)   | 7.90 (N=8)   | 8.15 (N=12)  | 8.40 (N=7)   | 8.65 (N=6)   |
|--------------------------|------------|--------------|--------------|--------------|--------------|--------------|
| Length ( $\mu\text{m}$ ) | —          | 185.86 $\pm$ | 189.02 $\pm$ | 247.01 $\pm$ | 265.83 $\pm$ | 288.15 $\pm$ |
|                          |            | 16.64        | 14.65        | 13.56        | 36.73        | 27.44        |

**Table S5.** Parameters of weight measured from *T. sacculifer* cultured at 6 different pH levels.

| pH                       | 7.40 (N=0) | 7.65 (N=6)      | 7.90 (N=8)      | 8.15 (N=12)     | 8.40 (N=7)      | 8.65 (N=6)       |
|--------------------------|------------|-----------------|-----------------|-----------------|-----------------|------------------|
| Weight ( $\mu\text{g}$ ) | —          | 5.00 $\pm$ 0.82 | 5.25 $\pm$ 0.80 | 7.75 $\pm$ 0.79 | 9.71 $\pm$ 2.02 | 10.17 $\pm$ 2.14 |
