# Supplementary material for: Biological Response of Planktic Foraminifera to Decline in Seawater pH
Source: Biology (Basel). 2022 Jan 9;11(1):98. doi: 10.3390/biology11010098 (PMC8773009; doi:10.3390/biology11010098)
Supplement: Supplementary file 1 [file biology-11-00098-s001.zip › Supporting Table S1.xlsx]

## Sheet: Temperature
Depth (m)	Temperature (°C)
1.006	28.7232
2.012	28.723
3.017	28.7241
4.023	28.7244
5.029	28.7243
6.035	28.7255
7.041	28.7246
8.046	28.7253
9.052	28.727
10.058	28.7266
11.064	28.7272
12.07	28.7287
13.075	28.7281
14.081	28.7262
15.087	28.7271
16.093	28.7266
17.099	28.7261
18.105	28.7266
19.111	28.727
20.116	28.7281
21.122	28.7281
22.128	28.7282
23.134	28.7293
24.14	28.7263
25.146	28.726
26.152	28.7131
27.158	28.7249
28.164	28.7066
29.169	28.7079
30.175	28.7083
31.181	28.7101
32.187	28.7068
33.193	28.706
34.199	28.711
35.205	28.7116
36.211	28.7065
37.217	28.6986
38.223	28.7029
39.229	28.7088
40.235	28.7086
41.241	28.7077
42.247	28.7031
43.253	28.6929
44.259	28.6969
45.265	28.7073
46.271	28.7091
47.277	28.6941
48.283	28.6933
49.289	28.6934
50.295	28.6878
51.301	28.691
52.307	28.7059
53.313	28.7064
54.319	28.6984
55.325	28.6481
56.331	28.5282
57.337	28.5482
58.343	28.5016
59.349	28.5068
60.355	28.4301
61.361	28.5598
62.367	28.5482
63.374	28.3974
64.38	27.9386
65.386	27.8889
66.392	27.8963
67.398	27.9103
68.404	27.7226
69.41	27.4769
70.416	27.2902
71.422	27.1942
72.428	27.0787
73.435	26.6231
74.441	26.2116
75.447	26.0869
76.453	26.09
77.459	26.0871
78.465	26.1275
79.471	26.0962
80.478	26.0634
81.484	25.9897
82.49	25.7007
83.496	25.4522
84.502	25.6663
85.509	25.7417
86.515	25.6771
87.521	25.5555
88.527	25.4674
89.533	25.3352
90.54	25.0149
91.546	24.4852
92.552	24.3975
93.558	24.3924
94.564	24.4548
95.571	24.4597
96.577	24.3784
97.583	24.2883
98.589	24.1894
99.596	24.1737
100.602	24.2473
101.608	24.2579
102.614	24.2361
103.621	24.0372
104.627	23.8518
105.633	23.83
106.64	23.8094
107.646	23.8956
108.652	23.7216
109.658	23.4934
110.665	22.9943
111.671	22.6248
112.678	22.693
113.684	22.8426
114.69	22.8129
115.696	22.5901
116.703	22.1585
117.709	21.4916
118.715	21.339
119.722	21.4583
120.728	21.5852
121.735	21.3663
122.741	21.2179
123.747	21.1084
124.754	20.7809
125.76	20.7148
126.767	20.4209
127.773	20.0771
128.779	19.9087
129.786	20.1046
130.792	20.0705
131.799	20.0301
132.805	19.9794
133.811	19.9284
134.818	19.7666
135.824	19.2172
136.831	19.0979
137.837	19.5386
138.844	19.4778
139.85	19.3948
140.857	19.0093
141.863	18.6299
142.869	18.4875
143.876	18.1677
144.882	17.9151
145.889	17.8455
146.895	17.9304
147.902	17.832
148.908	17.7871
149.915	17.6993
150.921	17.6072
151.928	17.5864
152.934	17.5673
153.941	17.5955
154.947	17.5863
155.954	17.5629
156.96	17.4629
157.967	17.1524
158.974	17.05
159.98	17.1698
160.987	16.8674
161.993	16.6258
163	16.654
164.006	16.8549
165.013	16.7792
166.019	16.6235
167.026	16.3264
168.033	15.9405
169.039	15.7628
170.046	15.8515
171.052	15.8994
172.059	15.7941
173.066	15.7024
174.072	15.4937
175.079	15.2433
176.086	15.1928
177.092	15.1859
178.099	15.2167
179.106	15.2045
180.112	15.1972
181.119	15.1675
182.126	15.0741
183.132	15.0112
184.139	14.98
185.146	14.8416
186.152	14.7661
187.159	14.646
188.166	14.4688
189.172	14.1789
190.179	14.175
191.186	14.1175
192.192	14.2025
193.199	14.1551
194.206	14.057
195.212	13.9366
196.219	13.9419
197.226	13.9099
198.233	13.6574
199.239	13.5845
200.246	13.6505

## Sheet: Salinity
Depth (m)	Salinity (psu)
1.006	34.227
2.012	34.2271
3.017	34.2271
4.023	34.227
5.029	34.227
6.035	34.227
7.041	34.2269
8.046	34.227
9.052	34.227
10.058	34.2269
11.064	34.2269
12.07	34.2269
13.075	34.2269
14.081	34.2269
15.087	34.227
16.093	34.2269
17.099	34.2269
18.105	34.2269
19.111	34.2268
20.116	34.2268
21.122	34.2268
22.128	34.2267
23.134	34.2266
24.14	34.2269
25.146	34.2266
26.152	34.2275
27.158	34.2271
28.164	34.2279
29.169	34.2278
30.175	34.2276
31.181	34.2277
32.187	34.2275
33.193	34.226
34.199	34.2258
35.205	34.2258
36.211	34.2261
37.217	34.2265
38.223	34.2263
39.229	34.2261
40.235	34.2263
41.241	34.2264
42.247	34.2265
43.253	34.227
44.259	34.2271
45.265	34.2265
46.271	34.2269
47.277	34.2288
48.283	34.2291
49.289	34.231
50.295	34.2346
51.301	34.233
52.307	34.2296
53.313	34.2299
54.319	34.2344
55.325	34.2633
56.331	34.3329
57.337	34.3268
58.343	34.362
59.349	34.3665
60.355	34.4138
61.361	34.3412
62.367	34.3534
63.374	34.4463
64.38	34.6994
65.386	34.7384
66.392	34.7486
67.398	34.742
68.404	34.8392
69.41	34.9459
70.416	35.0078
71.422	35.0292
72.428	35.0486
73.435	35.0959
74.441	35.1266
75.447	35.1271
76.453	35.1275
77.459	35.1249
78.465	35.1307
79.471	35.1294
80.478	35.1291
81.484	35.1353
82.49	35.1429
83.496	35.1204
84.502	35.1286
85.509	35.1333
86.515	35.1344
87.521	35.1335
88.527	35.1307
89.533	35.129
90.54	35.1276
91.546	35.1146
92.552	35.0959
93.558	35.1031
94.564	35.0991
95.571	35.0999
96.577	35.1051
97.583	35.118
98.589	35.1184
99.596	35.1195
100.602	35.122
101.608	35.1237
102.614	35.1249
103.621	35.1337
104.627	35.1289
105.633	35.1208
106.64	35.1256
107.646	35.1357
108.652	35.1229
109.658	35.1258
110.665	35.1395
111.671	35.13
112.678	35.1288
113.684	35.1253
114.69	35.1331
115.696	35.1404
116.703	35.1444
117.709	35.1091
118.715	35.0753
119.722	35.094
120.728	35.1034
121.735	35.1021
122.741	35.0883
123.747	35.0865
124.754	35.05
125.76	35.0405
126.767	35.0319
127.773	34.9849
128.779	34.9527
129.786	34.9778
130.792	34.9734
131.799	34.9683
132.805	34.964
133.811	34.9554
134.818	34.9654
135.824	34.8806
136.831	34.8696
137.837	34.9243
138.844	34.9188
139.85	34.9077
140.857	34.8846
141.863	34.8354
142.869	34.8214
143.876	34.8144
144.882	34.7867
145.889	34.7754
146.895	34.7871
147.902	34.7818
148.908	34.7736
149.915	34.7731
150.921	34.7642
151.928	34.7593
152.934	34.7596
153.941	34.7627
154.947	34.7637
155.954	34.762
156.96	34.7605
157.967	34.7382
158.974	34.7204
159.98	34.7336
160.987	34.7115
161.993	34.6833
163	34.6833
164.006	34.7016
165.013	34.6988
166.019	34.6762
167.026	34.6777
168.033	34.6214
169.039	34.6002
170.046	34.6118
171.052	34.6203
172.059	34.6085
173.066	34.5998
174.072	34.5893
175.079	34.5647
176.086	34.5538
177.092	34.5531
178.099	34.5579
179.106	34.5565
180.112	34.5563
181.119	34.558
182.126	34.552
183.132	34.5458
184.139	34.5423
185.146	34.5328
186.152	34.5271
187.159	34.5161
188.166	34.5065
189.172	34.4826
190.179	34.4731
191.186	34.4745
192.192	34.4768
193.199	34.4783
194.206	34.4739
195.212	34.4589
196.219	34.459
197.226	34.4576
198.233	34.4391
199.239	34.4359
200.246	34.4429

## Sheet: Light intensity
Depth (m)	Light intensity (µmol·m−2·s−1)
5.1	2517.42
5.2	2507.35
5.3	2497.31
5.4	2487.32
5.5	2477.36
5.6	2467.45
5.7	2457.57
5.8	2447.74
5.9	2437.94
6	2428.19
6.1	2418.47
6.2	2408.79
6.3	2399.15
6.4	2389.55
6.5	2379.99
6.6	2370.46
6.7	2360.98
6.8	2351.53
6.9	2342.12
7	2332.74
7.1	2323.41
7.2	2314.11
7.3	2304.85
7.4	2295.62
7.5	2286.44
7.6	2277.29
7.7	2268.17
7.8	2259.1
7.9	2250.06
8	2241.05
8.1	2232.08
8.2	2223.15
8.3	2214.25
8.4	2205.39
8.5	2196.56
8.6	2187.77
8.7	2179.02
8.8	2170.3
8.9	2161.61
9	2152.96
9.1	2144.35
9.2	2135.76
9.3	2127.22
9.4	2118.7
9.5	2110.23
9.6	2101.78
9.7	2093.37
9.8	2084.99
9.9	2076.65
10	2068.34
10.1	2060.06
10.2	2051.81
10.3	2043.6
10.4	2035.43
10.5	2027.28
10.6	2019.17
10.7	2011.09
10.8	2003.04
10.9	1995.02
11	1987.04
11.1	1979.09
11.2	1971.16
11.3	1963.28
11.4	1955.42
11.5	1947.59
11.6	1939.8
11.7	1932.04
11.8	1924.3
11.9	1916.6
12	1908.93
12.1	1901.29
12.2	1893.69
12.3	1886.11
12.4	1878.56
12.5	1871.04
12.6	1863.55
12.7	1856.09
12.8	1848.67
12.9	1841.27
13	1833.9
13.1	1826.56
13.2	1819.25
13.3	1811.97
13.4	1804.72
13.5	1797.5
13.6	1790.3
13.7	1783.14
13.8	1776
13.9	1768.89
14	1761.82
14.1	1754.76
14.2	1747.74
14.3	1740.75
14.4	1733.78
14.5	1726.84
14.6	1719.93
14.7	1713.05
14.8	1706.19
14.9	1699.37
15	1692.56
15.1	1685.79
15.2	1679.04
15.3	1672.32
15.4	1665.63
15.5	1658.97
15.6	1652.33
15.7	1645.71
15.8	1639.13
15.9	1632.57
16	1626.04
16.1	1619.53
16.2	1613.05
16.3	1606.59
16.4	1600.16
16.5	1593.76
16.6	1587.38
16.7	1581.03
16.8	1574.7
16.9	1568.4
17	1562.12
17.1	1555.87
17.2	1549.64
17.3	1543.44
17.4	1537.26
17.5	1531.11
17.6	1524.99
17.7	1518.88
17.8	1512.8
17.9	1506.75
18	1500.72
18.1	1494.71
18.2	1488.73
18.3	1482.77
18.4	1476.84
18.5	1470.93
18.6	1465.04
18.7	1459.18
18.8	1453.34
18.9	1447.52
19	1441.73
19.1	1435.96
19.2	1430.21
19.3	1424.49
19.4	1418.79
19.5	1413.11
19.6	1407.46
19.7	1401.82
19.8	1396.21
19.9	1390.63
20	1385.06
20.1	1379.52
20.2	1374
20.3	1368.5
20.4	1363.02
20.5	1357.57
20.6	1352.13
20.7	1346.72
20.8	1341.33
20.9	1335.97
21	1330.62
21.1	1325.29
21.2	1319.99
21.3	1314.71
21.4	1309.45
21.5	1304.21
21.6	1298.99
21.7	1293.79
21.8	1288.61
21.9	1283.45
22	1278.32
22.1	1273.2
22.2	1268.11
22.3	1263.03
22.4	1257.98
22.5	1252.94
22.6	1247.93
22.7	1242.93
22.8	1237.96
22.9	1233.01
23	1228.07
23.1	1223.16
23.2	1218.26
23.3	1213.39
23.4	1208.53
23.5	1203.69
23.6	1198.88
23.7	1194.08
23.8	1189.3
23.9	1184.54
24	1179.8
24.1	1175.08
24.2	1170.38
24.3	1165.69
24.4	1161.03
24.5	1156.38
24.6	1151.75
24.7	1147.14
24.8	1142.55
24.9	1137.98
25	1133.43
25.1	1128.89
25.2	1124.37
25.3	1119.87
25.4	1115.39
25.5	1110.93
25.6	1106.48
25.7	1102.05
25.8	1097.64
25.9	1093.25
26	1088.87
26.1	1084.52
26.2	1080.18
26.3	1075.85
26.4	1071.55
26.5	1067.26
26.6	1062.99
26.7	1058.73
26.8	1054.5
26.9	1050.28
27	1046.07
27.1	1041.89
27.2	1037.72
27.3	1033.57
27.4	1029.43
27.5	1025.31
27.6	1021.21
27.7	1017.12
27.8	1013.05
27.9	1008.99
28	1004.96
28.1	1000.94
28.2	996.929
28.3	992.94
28.4	988.966
28.5	985.008
28.6	981.066
28.7	977.14
28.8	973.23
28.9	969.335
29	965.455
29.1	961.592
29.2	957.744
29.3	953.911
29.4	950.093
29.5	946.291
29.6	942.504
29.7	938.732
29.8	934.975
29.9	931.233
30	927.507
30.1	923.795
30.2	920.098
30.3	916.416
30.4	912.748
30.5	909.095
30.6	905.457
30.7	901.834
30.8	898.224
30.9	894.63
31	891.05
31.1	887.484
31.2	883.932
31.3	880.394
31.4	876.871
31.5	873.362
31.6	869.867
31.7	866.386
31.8	862.918
31.9	859.465
32	856.025
32.1	852.6
32.2	849.187
32.3	845.789
32.4	842.404
32.5	839.033
32.6	835.675
32.7	832.331
32.8	829
32.9	825.682
33	822.378
33.1	819.087
33.2	815.809
33.3	812.544
33.4	809.292
33.5	806.053
33.6	802.828
33.7	799.615
33.8	796.415
33.9	793.227
34	790.053
34.1	786.891
34.2	783.742
34.3	780.606
34.4	777.482
34.5	774.37
34.6	771.271
34.7	768.185
34.8	765.11
34.9	762.048
35	758.999
35.1	755.961
35.2	752.936
35.3	749.923
35.4	746.921
35.5	743.932
35.6	740.955
35.7	737.99
35.8	735.036
35.9	732.095
36	729.165
36.1	726.247
36.2	723.34
36.3	720.446
36.4	717.562
36.5	714.691
36.6	711.831
36.7	708.982
36.8	706.145
36.9	703.319
37	700.504
37.1	697.701
37.2	694.908
37.3	692.127
37.4	689.357
37.5	686.599
37.6	683.851
37.7	681.114
37.8	678.388
37.9	675.674
38	672.969
38.1	670.276
38.2	667.594
38.3	664.922
38.4	662.261
38.5	659.611
38.6	656.971
38.7	654.342
38.8	651.723
38.9	649.115
39	646.517
39.1	643.93
39.2	641.353
39.3	638.786
39.4	636.23
39.5	633.684
39.6	631.148
39.7	628.622
39.8	626.106
39.9	623.601
40	621.105
40.1	618.619
40.2	616.144
40.3	613.678
40.4	611.222
40.5	608.776
40.6	606.339
40.7	603.913
40.8	601.496
40.9	599.089
41	596.691
41.1	594.303
41.2	591.925
41.3	589.556
41.4	587.197
41.5	584.847
41.6	582.506
41.7	580.175
41.8	577.853
41.9	575.541
42	573.237
42.1	570.943
42.2	568.658
42.3	566.383
42.4	564.116
42.5	561.858
42.6	559.61
42.7	557.37
42.8	555.14
42.9	552.918
43	550.705
43.1	548.501
43.2	546.306
43.3	544.12
43.4	541.943
43.5	539.774
43.6	537.614
43.7	535.462
43.8	533.319
43.9	531.185
44	529.059
44.1	526.942
44.2	524.833
44.3	522.733
44.4	520.641
44.5	518.557
44.6	516.482
44.7	514.415
44.8	512.356
44.9	510.306
45	508.263
45.1	506.229
45.2	504.204
45.3	502.186
45.4	500.176
45.5	498.174
45.6	496.181
45.7	494.195
45.8	492.217
45.9	490.247
46	488.285
46.1	486.331
46.2	484.385
46.3	482.446
46.4	480.516
46.5	478.593
46.6	476.677
46.7	474.77
46.8	472.87
46.9	470.977
47	469.093
47.1	467.215
47.2	465.345
47.3	463.483
47.4	461.628
47.5	459.781
47.6	457.941
47.7	456.108
47.8	454.283
47.9	452.465
48	450.654
48.1	448.851
48.2	447.054
48.3	445.265
48.4	443.483
48.5	441.708
48.6	439.941
48.7	438.18
48.8	436.427
48.9	434.68
49	432.94
49.1	431.208
49.2	429.482
49.3	427.763
49.4	426.051
49.5	424.346
49.6	422.648
49.7	420.957
60	278.523
70	186.513
80	124.898
90	83.6382
100	56.0083
110	37.506
120	25.1159
130	16.8188
140	11.2627
150	7.5421
160	5.05056
170	3.38211
180	2.26483
190	1.51664
200	1.01562
